# Supplementary material for: Activating Mutations in PTPN11 and KRAS in Canine Histiocytic Sarcomas
Source: PubMed Central journal article supplement (PMC6678586; doi:10.3390/genes10070505), 2019-07-04

**Supplementary Figure S1:** Representative allelic discrimination plot from a PTPN11<sup>C503V</sup> genotyping assay. Genotype is determined by sequence-specific probes, one for each allele (wild type and mutant). Each circle represents a sample, and black squares represent negative controls. Sample indicated as an X, represents an undetermined genotype, and further characterized by Sanger sequencing for determination of genotype.

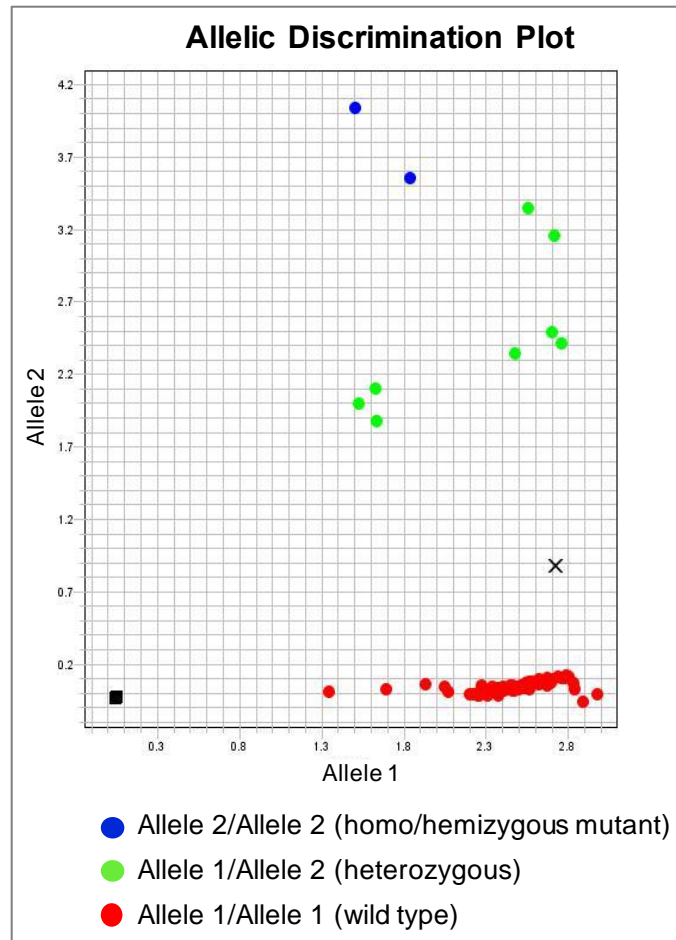

Supplement: genes-10-00505-s001.pdf [file genes-10-00505-s001.pdf]
